# Supplementary material for: Advancements in RNASeqGUI towards a Reproducible Analysis of RNA-Seq Experiments
Source: Hindawi journal article supplement (doi:10.1155/2016/7972351), 2016-01-01

## Supplementary data

### Supplementary Material Figure 1

```
# The mm9 project report
### Project created the 2015-05-28 11:31:32

* In the *NOISeq Interface*, you clicked the **Run NOISeq** button at `2015-05-28 11:36:02`
and the c_vs_dec.txt_prob=0.8_DE_genes_NOISeq.csv file has been saved in the `mm9\Results` folder.

You chose the following count file: `c_vs_dec.txt`, prob: `0.8`, Project: `mm9`,
Tissue= c('c','c','dec','dec'), TissueRun= c('S1','S5','S4','S8').

This R code has been run:

```{r}
require(NOISeq)
the.file2='c_vs_dec.txt'
noide2_db <- InitDb(db.name=paste(the.file2,'noide2_db',sep='_'), db.path='cache')
x <- LoadCachedObject(noide2_db, 'maindataframe_key')
the.file <- LoadCachedObject(noide2_db, 'the_file_key')
Project <- LoadCachedObject(noide2_db, 'project_key')
conditions <- LoadCachedObject(noide2_db, 'conditions_key')
TissueRuns <- LoadCachedObject(noide2_db, 'tissueruns_key')
p <- LoadCachedObject(noide2_db, 'p_key')
technical=TRUE
print('You loaded this count file: ')
print(head(as.matrix(x)))
mynoiseq = NULL
if (technical == TRUE){ # technical replicate
  print('NOISeq has been started on TECHNICAL replicates')
  #myfactors = data.frame(Tissue = conditions, TissueRun = TissueRuns)
  #mydata <- NOISeq::readData(data=x, factors = myfactors)
  #mynoiseq = noiseq(mydata,k=0.5,norm='n',factor='Tissue',pnr = 0.2,nss = 5,
  #v = 0.02,lc = 0,replicates=technical)
  mynoiseq <- LoadCachedObject(noide2_db, 'mynoiseq_key')
}else{ # biological replicate
  print('NOISeqBIO has been started on BIOLOGICAL replicates')
  #myfactors = data.frame(Tissue = conditions, TissueRun = TissueRuns)
  #mydata <- NOISeq::readData(data=x, factors=myfactors)
  #mynoiseq = noiseqbio(mydata, k = 0.5, norm = 'n', factor='Tissue', lc = 0, r = 20, adj = 1.5,
  #plot = FALSE, a0per = 0.9, random.seed = 12345, filter = 0)
  mynoiseq <- LoadCachedObject(noide2_db, 'mynoiseq_key')
}
print('First five lines of the results.')
print( head(mynoiseq@results[[1]]) )
#list_DE_NOISeq = subset(mynoiseq@results[[1]], prob > p) # select significant genes
list_DE_NOISeq <- LoadCachedObject(noide2_db, 'listdenoiseq_key')
```
```

## Supplementary Material Figure 2

RNASeqGUI\_Projects/mm9/Logs/report.html

Search

### The mm9 project report

**Project created the 2015-05-28 11:31:32**

• In the *NOISeq* Interface, you clicked the **Run NOISeq** button at 2015-05-28 11:36:02 and the `c_vs_dec.txt_prob=0.8_DE_genes_NOISeq.csv` file has been saved in the `mm9\Results` folder.

You chose the following count file: `c_vs_dec.txt`, prob: `0.8`, Project: `mm9`, Tissue= `c('c','c','dec','dec')`, TissueRun= `c('S1','S5','S4','S8')`.

This R code has been run:

```

require(NOISeq)
the.file2='c_vs_dec.txt'
noide2_db <- InitDb(db.name=paste(the.file2,'noide2_db',sep='_'), db.path='cache')
x <- LoadCachedObject(noide2_db, 'maindataframe_key')
the.file <- LoadCachedObject(noide2_db, 'the_file_key')
Project <- LoadCachedObject(noide2_db, 'project_key')
conditions <- LoadCachedObject(noide2_db, 'conditions_key')
TissueRuns <- LoadCachedObject(noide2_db, 'tissueruns_key')
p <- LoadCachedObject(noide2_db, 'p_key')
technical='TRUE'
print('You loaded this count file: ')

## [1] "You loaded this count file: "

print(head(as.matrix(x)))

##
##          S1  S5  S4  S8
## ENSMUSG00000063889 1935 1924 1404 1307
## ENSMUSG00000024231 1724 1639 1636 1674
## ENSMUSG00000024232  208  220  149  165
## ENSMUSG00000024235 1201 1241 1942 1843
## ENSMUSG00000024234  902  937  935  880
## ENSMUSG00000033960  613  683  615  618

mynoiseq = NULL
if (technical == TRUE){ # technical replicate
  print('NOISeq has been started on TECHNICAL replicates')
  #myfactors = data.frame(Tissue = conditions, TissueRun = TissueRuns)
  #mydata <- NOISeq::readData(data=x, factors = myfactors)
  #mynoiseq = noisec(mydata,k=0.5,norm='n',factor='Tissue',pnr = 0.2,nss = 5,
  #v = 0.02,lc = 0,replicates=technical)
  mynoiseq <- LoadCachedObject(noide2_db, 'mynoiseq_key')
}else{ # biological replicate
  print('NOISeqBIO has been started on BIOLOGICAL replicates')
  #myfactors = data.frame(Tissue = conditions, TissueRun = TissueRuns)
  #mydata <- NOISeq::readData(data=x, factors=myfactors)
  #mynoiseq = noisecbio(mydata, k = 0.5, norm = 'n', factor='Tissue', lc = 0, r = 20, adj = 1.5,
  #plot = FALSE, a0per = 0.9, random.seed = 12345, filter = 0)
  mynoiseq <- LoadCachedObject(noide2_db, 'mynoiseq_key')
}

## [1] "NOISeq has been started on TECHNICAL replicates"

```

### Supplementary Material Figure 3

```
plot(log10(results_NoiseSeq[,2] * results_NoiseSeq[,1]), log10(results_NoiseSeq[,2]/results_NoiseSeq[,1]), col='black',  
main=paste('PlotFC ', the.file2, sep=''), xlab=paste('log10( ', colnames(results_NoiseSeq)[2], ' * ',  
colnames(results_NoiseSeq)[1], ' )', sep=''), ylab=paste('log10( ', colnames(results_NoiseSeq)[2],  
' / ', colnames(results_NoiseSeq)[1], ' )', sep=''), pch=19, cex=0.3)  
DE_genes_NoiseSeq = subset(results_NoiseSeq, prob>p)  
points(log10(DE_genes_NoiseSeq[,2] * DE_genes_NoiseSeq[,1]), log10(DE_genes_NoiseSeq[,2]/DE_genes_NoiseSeq[,1]),  
pch=19, col='red', cex=0.5)
```

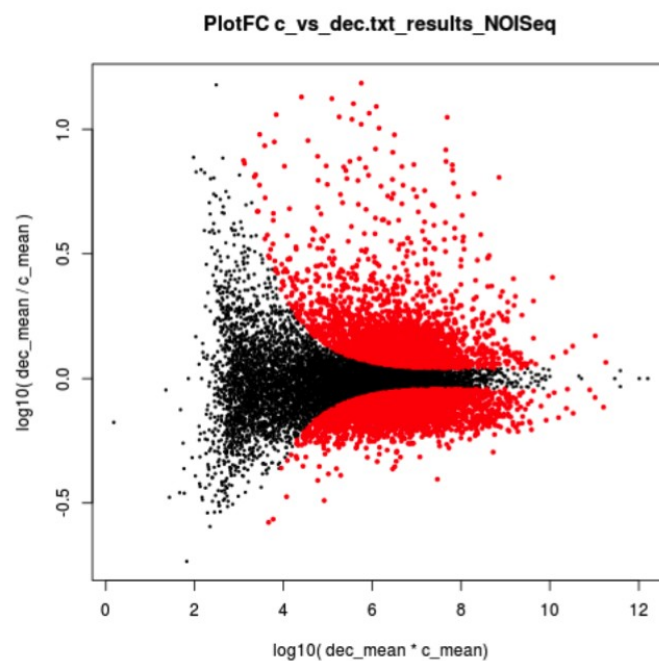

## Supplementary Material Figure 4

```

(A) { #x <- edgeR::DGEList(counts = x)
      #x <- edgeR::calcNormFactors(x,method='upperquartile')
      #x <- edgeR::estimateCommonDisp(x, verbose=FALSE)
      #x <- edgeR::estimateTagwiseDisp(x)
      #myuqua <- x$pseudo.counts
(B) { myuqua <- LoadCachedObject(uqua.db, 'myuqua_key')
      boxplot(log(myuqua+1),col=c('red','blue','gold','darkgreen'), main='Upper Quartile BoxPlot',las=2)
  
```

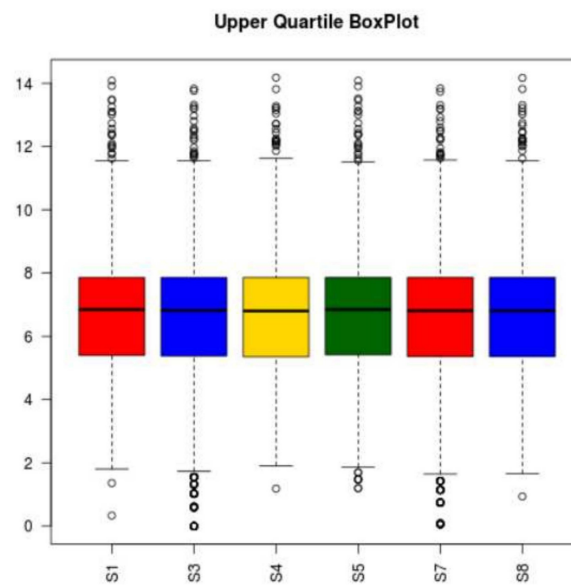

Supplement: f1 [file 7972351.f1.pdf]
